# Supplementary material
Source: PubMed Central journal article supplement (PMC8425601)
Supplement: NIHMS1717996-supplement-1.pdf [file NIHMS1717996-supplement-1.pdf]

# **IL-23/IL-17A/TRPV1 Axis Produces Mechanical Pain via Macrophage-Sensory Neuron Crosstalk in Female Mice**

Xin Luo, Ouyang Chen, Zilong Wang, Sangsu Bang, Jasmine Ji, Sang Hoon Lee, Yul Huh, Kenta Furutani, Qianru He, Xueshu Tao, Mei-Chuan Ko, Andrey Bortsov, Christopher R Donnelly, Yong Chen, Andrea Nackley, Temugin Berta, and Ru-Rong Ji

## **Supplemental Information (items)**

### **I. Supplemental Figures (8)**

Figure S1 (related to Figure 1)

Figure S2 (related to Figure 2)

Figure S3 (related to Figure 3)

Figure S4 (related to Figure 4)

Figure S5 (related to Figure 5)

Figure S6 (related to Figure 6)

Figure S7 (related to Figure 7)

Figure S8 (related to Figure 8)

### **II. Supplemental Tables**

Table S1 (related to Figure 4 and Figure 5): Gating strategy of flow cytometry

Table S2 (related to Figure 8): qPCR primer sequences for human genes

Table S3 (related to all figures): Number of animals used in all figures in the paper

Table S4 (related to all figures): Statistical details of all figures in the paper (separate Excel file)

Table S5 (related to all figures): Source data for figures in the paper (separate Excel file)

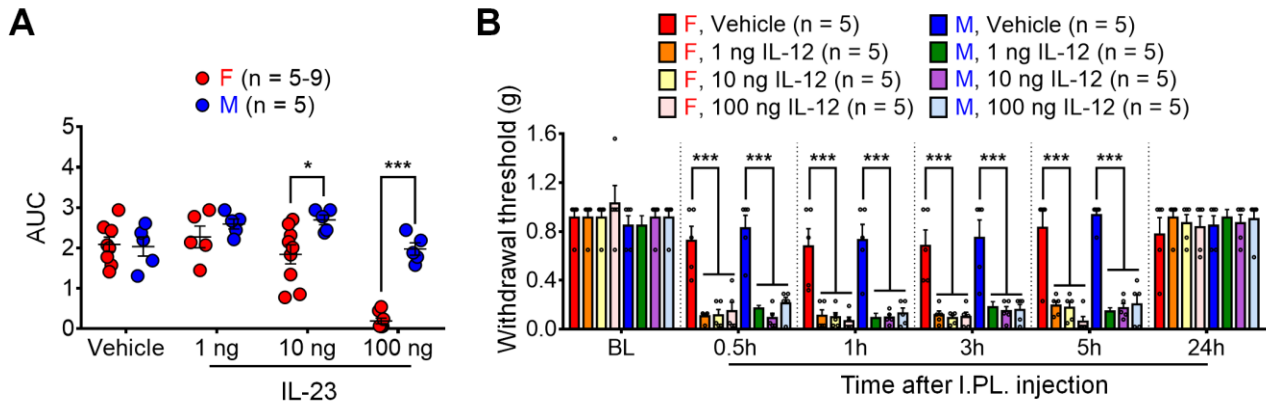

**Figure S1 (related to Figure 1). IL-23, but not IL-12, exhibits sex difference in producing mechanical pain in mice.**

(A) AUC of 0.5-5 h data in Fig. 1A shows that IL-23 at 10 ng and 100 ng induces female-dominant mechanical pain. \* $p < 0.05$ , \*\*\* $p < 0.001$ . Two-way ordinary ANOVA with Bonferroni's post hoc test:  $F_{(3, 42)} = 8.274$ .

(B) I.PL. injection of IL-12 at 1 ng, 10 ng or 100 ng induces comparable mechanical allodynia in both sexes. \*\*\* $p < 0.001$ . Two-way RM ANOVA with Bonferroni's post hoc test:  $F_{(35, 160)} = 5.533$ .

Data are mean  $\pm$  SEM. AUC: Area under curve; I.PL.: Intraplantar; BL: Baseline.

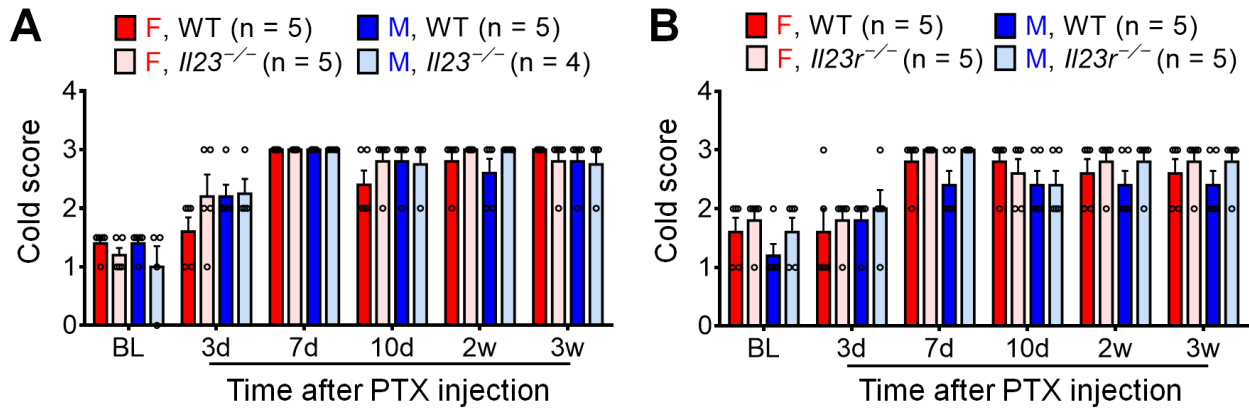

**Figure S2 (related to Figure 2). IL-23/IL-23R axis does not mediate cold pain in the CIPN model.**

Loss of IL-23 (*Il23*<sup>-/-</sup>, A) or IL-23 receptor (*Il23r*<sup>-/-</sup>, B) fails to alter cold allodynia in neither female nor male mice in the CIPN model (1 x PTX, 6 mg/kg). Two-way RM ANOVA with Bonferroni's post hoc test; A:  $F_{(15, 75)} = 1.365$ ; B:  $F_{(15, 80)} = 0.4865$ .

Data are mean  $\pm$  SEM. PTX: Paclitaxel; BL: Baseline.

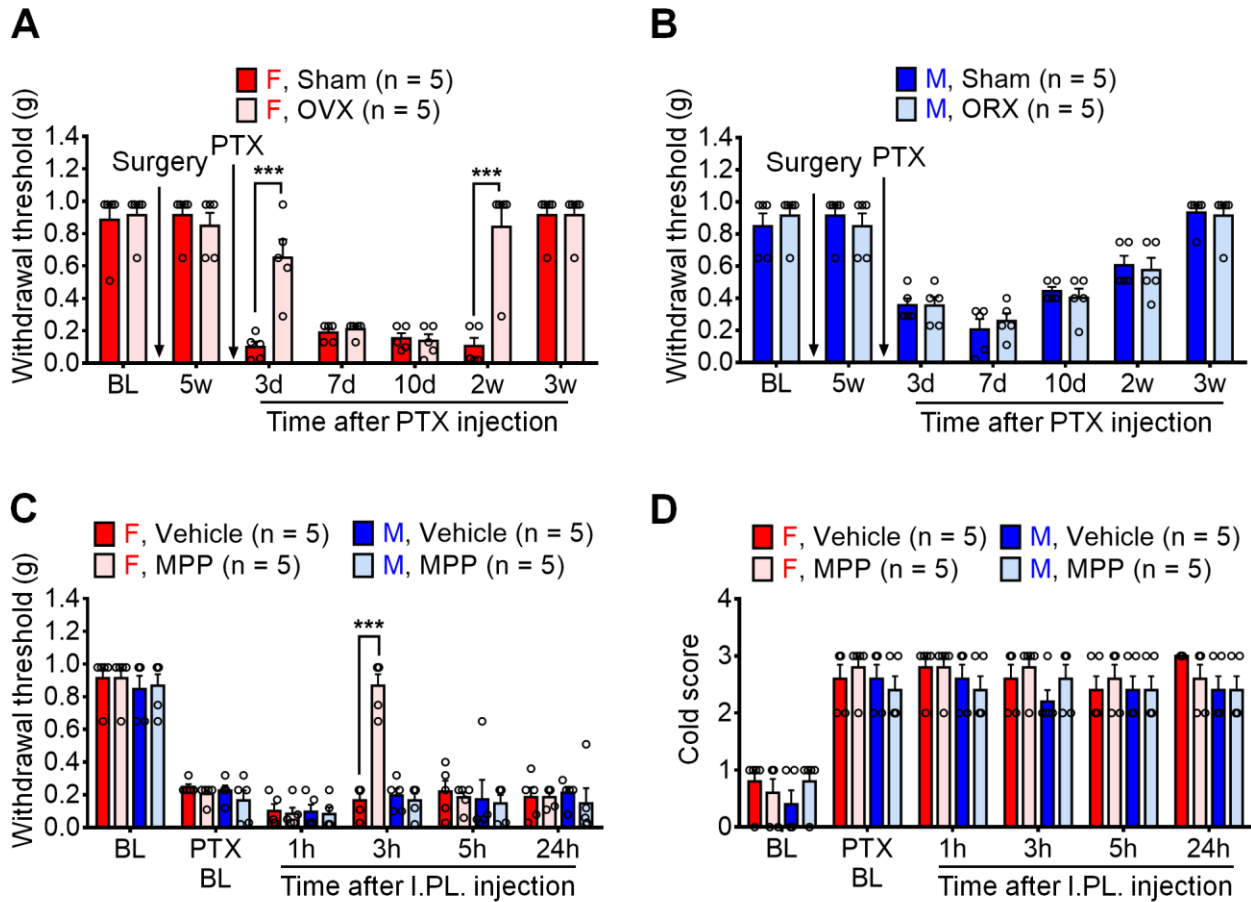

**Figure S3 (related to Figure 3). Estrogen/ER $\alpha$  signaling contributes to pathological pain only in female mice.**

(A) Estrogen deficiency by OVX reduces mechanical allodynia in females at 3d and 2w in CIPN (1 x PTX, 6 mg/kg). \*\*\* $p < 0.001$ . Two-way RM ANOVA with Bonferroni's post hoc test;  $F_{(6, 48)} = 11.08$ .

(B) Androgen deficiency by ORX does not affect mechanical allodynia in males in CIPN (1 x PTX, 6 mg/kg). Two-way RM ANOVA with Bonferroni's post hoc test;  $F_{(6, 48)} = 0.4182$ .

(C) Estrogen receptor  $\alpha$  antagonist MPP (I.PL., 30  $\mu$ g) reduces mechanical allodynia in female but not male mice in CIPN (4 x PTX, 2 mg/kg). \*\*\* $p < 0.001$ . Two-way RM ANOVA with Bonferroni's post hoc test;  $F_{(15, 80)} = 7.068$ .

(D) MPP (I.PL., 30  $\mu$ g) fails to affect cold allodynia in CIPN (4 x PTX, 2 mg/kg). Two-way RM ANOVA with Bonferroni's post hoc test;  $F_{(15, 80)} = 0.5895$ .

Data are mean  $\pm$  SEM. OVX: Ovariectomy; ORX: Orchiectomy; I.PL.: Intraplantar; PTX: Paclitaxel; BL: Baseline.

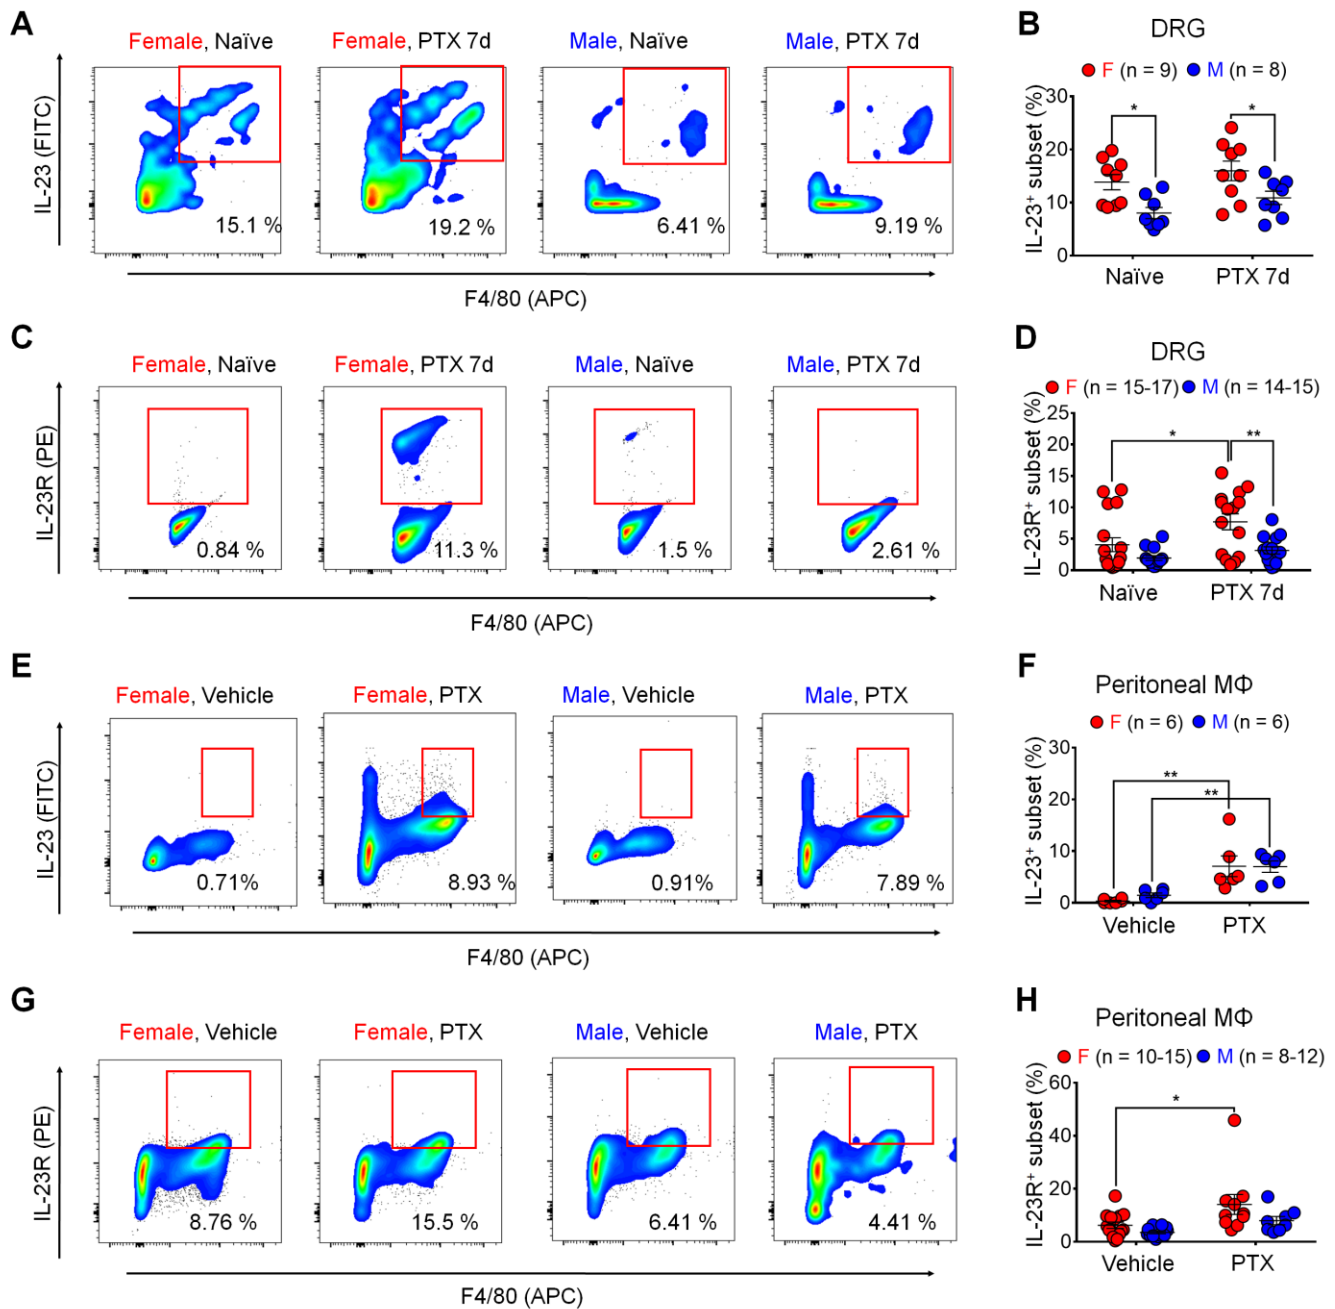

**Figure S4 (related to Figure 4). Females exhibit higher levels of IL-23<sup>+</sup> and IL-23R<sup>+</sup> subsets in peritoneal and DRG macrophages than males under chemotherapy condition.**

(A-B) Females display higher ratios of IL-23<sup>+</sup> subset in DRG macrophages than males under naïve and chemotherapy conditions (4 x PTX, 2 mg/kg). (A) Images of flow cytometry. (B) Quantification of IL-23<sup>+</sup> subset of DRG cells. \*p < 0.05. Two-way ordinary ANOVA with Bonferroni's post hoc test;  $F_{(1, 30)} = 0.06378$ .

(C-D) PTX increases ratios of IL-23R<sup>+</sup> subset in DRG macrophages from female but not male mice (4 x, 2 mg/kg). (C) Images of flow cytometry. (D) Quantification of IL-23R<sup>+</sup> subset of DRG cells. \*p < 0.05, \*\*p < 0.01. Two-way ordinary ANOVA with Bonferroni's post hoc test;  $F_{(1, 57)} = 1.682$ .

(E-F) PTX increases ratios of IL-23<sup>+</sup> subset in peritoneal macrophages cultured from both female and male mice (1 µg/ml, 16 h). (E) Images of flow cytometry. (F) Quantification of IL-23<sup>+</sup> peritoneal macrophages. \*\*p < 0.01. Two-way ordinary ANOVA with Bonferroni's post hoc test:  $F_{(1, 20)} = 0.2641$ .

(G-H) PTX increases ratios of IL-23R<sup>+</sup> subset in peritoneal macrophages cultured from female not male mice (1 µg/ml, 16 h). (G) Images of flow cytometry. (H) Quantification of IL-23R<sup>+</sup> peritoneal macrophages. \*p < 0.05.

Two-way ordinary ANOVA with Bonferroni's post hoc test,  $F_{(1, 41)} = 0.7265$ .

Data are mean  $\pm$  SEM. PTX: Paclitaxel; M $\Phi$ : Macrophage.

See Table S1 for the gating strategy of flow cytometry.

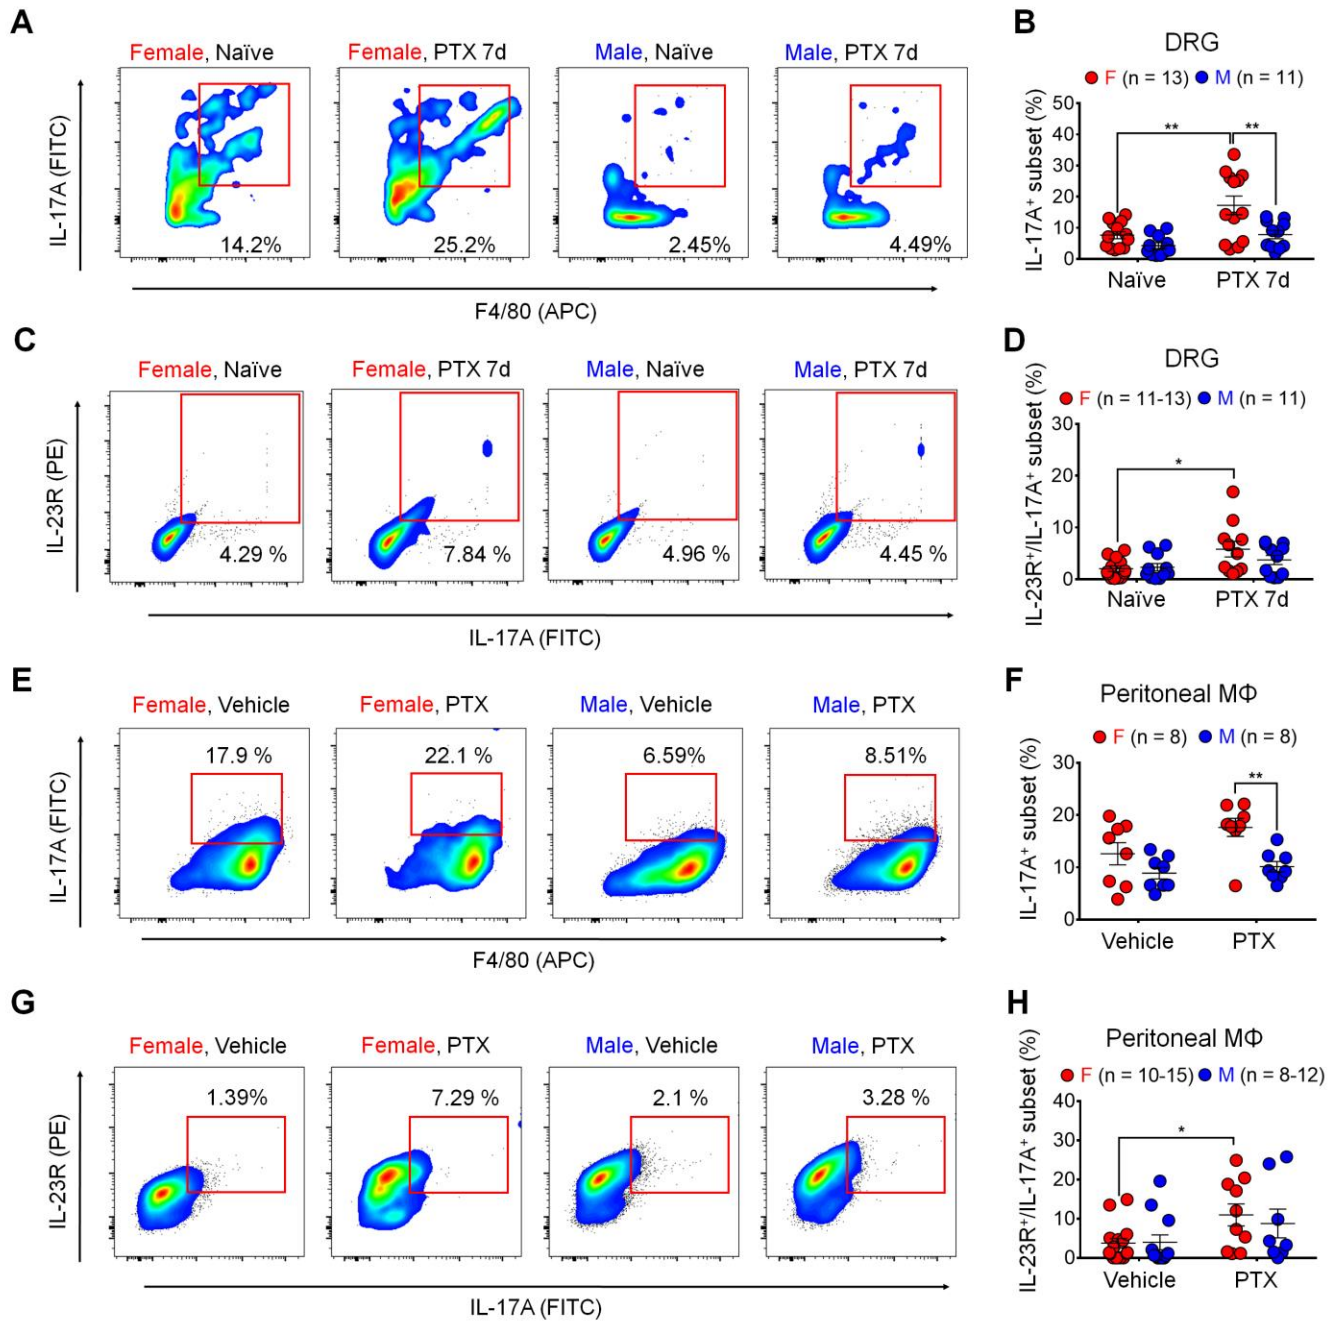

**Figure S5 (related to Figure 5). PTX increases IL-17A<sup>+</sup> and IL-17A<sup>+</sup>/IL-23R<sup>+</sup> subsets in DRG and peritoneal macrophages.**

(A-B) PTX increases ratios of IL-17A<sup>+</sup> subset in DRG macrophages from female but not male mice (4 x PTX, 2 mg/kg). (A) Images of flow cytometry. (B) Quantification of IL-17A<sup>+</sup> subset of DRG cells. \*\*p < 0.01. Two-way ordinary ANOVA with Bonferroni's post hoc test;  $F_{(1,44)} = 2.531$ .

(C-D) PTX increases ratios of IL-17A<sup>+</sup>/IL-23R<sup>+</sup> subset in DRG macrophages from female but not male mice (4 x, 2 mg/kg). (C) Images of flow cytometry. (D) Quantification of IL-17A<sup>+</sup>/IL-23R<sup>+</sup> subset of DRG cells. \*p < 0.05. Two-way ordinary ANOVA with Bonferroni's post hoc test:  $F_{(1,42)} = 1.529$ .

(E-F) PTX increases ratios of IL-17A<sup>+</sup> subset in peritoneal macrophages from female but not male mice (1 μg/ml, 16 h). (E) Images of flow cytometry. (F) Quantification of IL-17A<sup>+</sup> subset of peritoneal macrophages. \*\*p < 0.01. Two-way ordinary ANOVA with Bonferroni's post hoc test,  $F_{(1,28)} = 1.487$ .

(G-H) PTX increases ratios of IL-17A<sup>+</sup>/IL-23R<sup>+</sup> subset in female peritoneal macrophages (1 μg/ml, 16h). \*p <

0.05. (G) Images of flow cytometry. (H) Quantification of IL-17A<sup>+</sup>/IL-23R<sup>+</sup> subset of peritoneal macrophages. Two-way ordinary ANOVA with Bonferroni's post hoc test;  $F_{(1, 41)} = 0.2854$ .

Data are mean  $\pm$  SEM. PTX: Paclitaxel; M $\Phi$ : Macrophage.

See Table S1 for the gating strategy of flow cytometry.



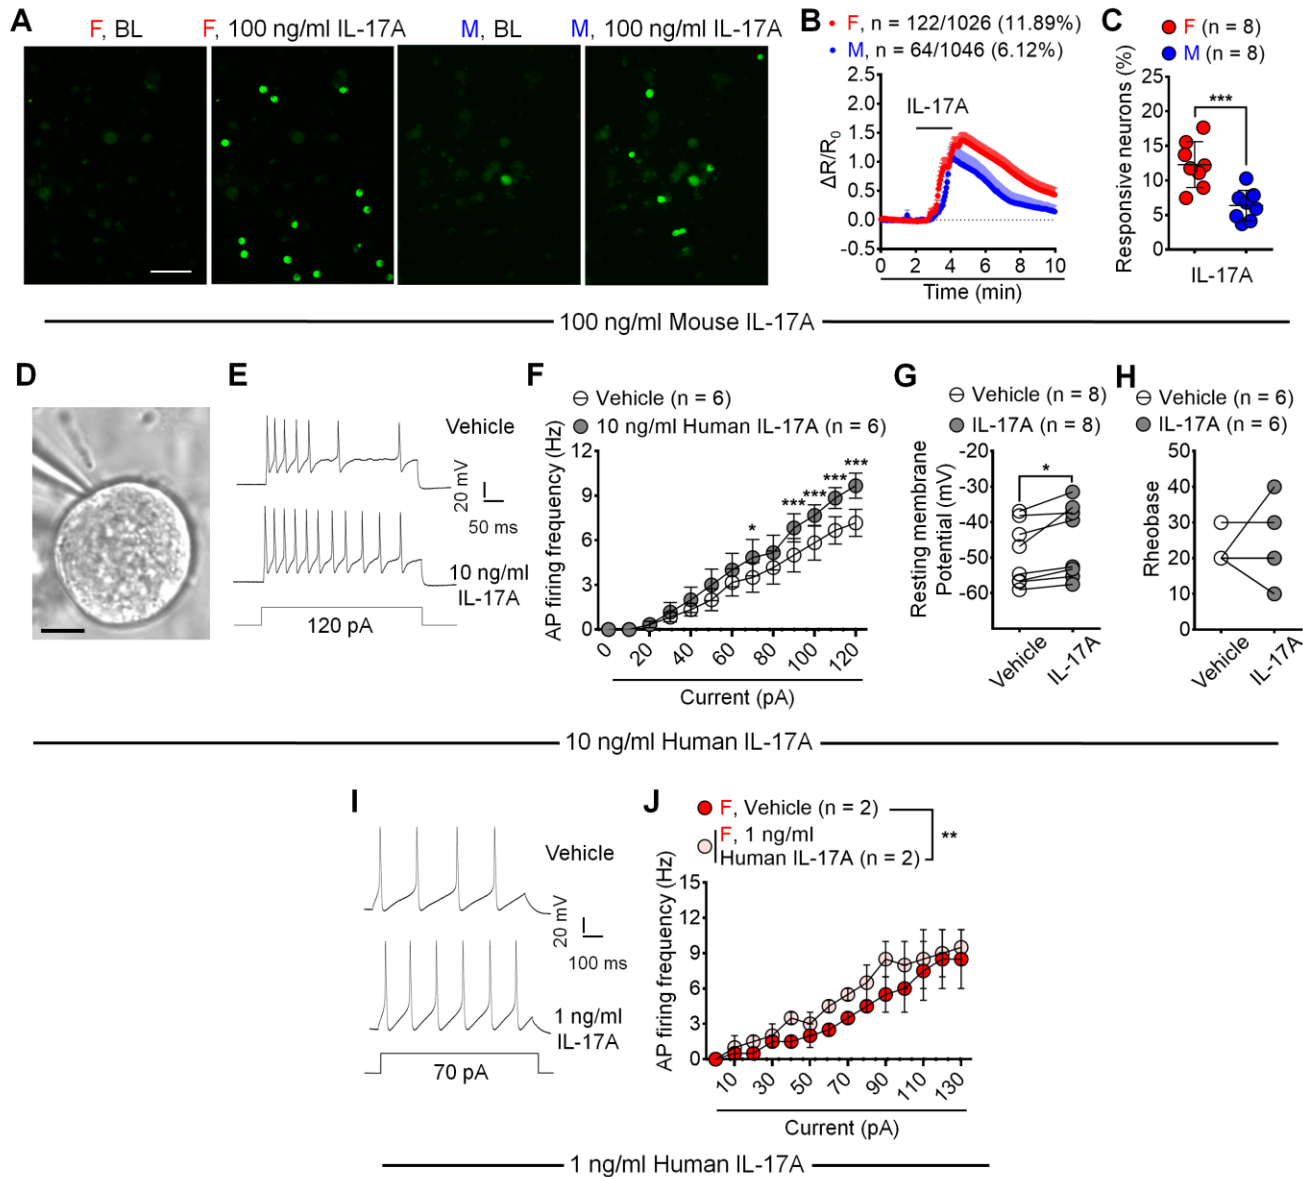

**Figure S6 (related to Figure 6). IL-17A activates mouse and human DRG sensory neurons.**

(A-C) Acute perfusion of IL-17A (100 ng/ml, 2 min) evokes  $\text{Ca}^{2+}$  influx in DRG sensory neurons cultured from both female and male *Advillin<sup>Cre</sup>/GCamp6f* mice.

(A) Representative images. Scale bar: 100  $\mu\text{m}$ .

(B) Combined responses of all neurons.

(C) % quantification of responding neurons. Notably, 11.89% of female neurons (122/1026) and 6.12% male neurons (64/1046) respond to IL-17A. n = 8 cultures from 4 mice per sex. Unpaired two-tailed student t test: p = 0.0009, t = 4.211.

(D-J) Responses of human DRG neurons to IL-17A.

(D) Representative image showing human DRG neuron being recorded. Scale bar: 20  $\mu\text{m}$ .

(E) Traces of APs in human DRG neurons (from 2 male and 1 female donors) perfused with vehicle or IL-17A (10 ng/ml, 2 min).

(F) Quantification of AP firing frequencies as shown in (D). \*p < 0.05, \*\*\*p < 0.001. Two-way RM ANOVA with Bonferroni's post hoc test; F (12, 60) = 36.45.

(G-H) Effects of IL-17A on resting membrane potential (G) and rheobase (H) of human DRG neurons. Paired and two-tailed Student's t-test; G:  $t = 3.143$ ; H:  $t = 0.0$ .

(I-J) Acute perfusion of IL-17A (1 ng/ml, 2 min) increases SP firing in human DRG neurons from one female donor, as indicated by AP traces (I) and quantification of AP firing rate (J).  $**p < 0.01$ . Two-way RM ANOVA with Bonferroni's post hoc test;  $F_{(13, 13)} = 5.939$ .

Data are mean  $\pm$  SEM. AP: Action potential.

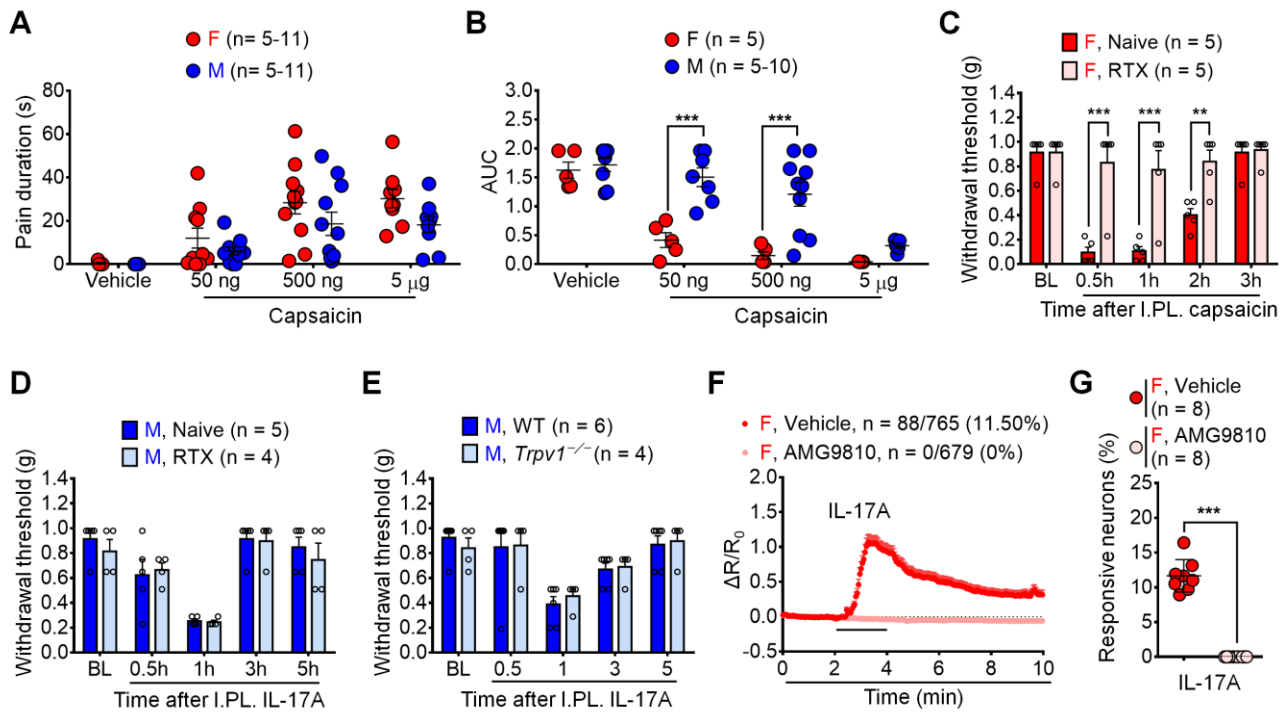

**Figure S7 (related to Figure 7). IL-17A-induced pain does not require C-fiber nociceptors and TRPV1 in males.**

(A) I.PL. injection of capsaicin at 50 ng, 500 ng or 5  $\mu$ g produces comparable spontaneous pain in both sexes. Two-way ordinary ANOVA with Bonferroni's post hoc test;  $F_{(3, 62)} = 0.5063$ . Note females show a trend of greater spontaneous pain than males.

(B) AUC of 0.5-2h data in Fig. 7E shows that capsaicin at 50 ng and 500 ng induces female-dominant mechanical pain.  $***p < 0.001$ . Two-way ordinary ANOVA with Bonferroni's post hoc;  $F_{(3, 42)} = 5.227$

(C) RTX abolishes capsaicin-induced mechanical pain (I.PL., 500 ng) in females.  $**p < 0.01$ ,  $***p < 0.001$ . Two-way RM ANOVA with Bonferroni's post hoc test;  $F_{(4, 32)} = 6.777$ . RTX was given by subcutaneous injections for 3 continuous days at the escalating doses of 30, 50 and 100  $\mu$ g/kg

(D-E) RTX treatment (D) or *Trpv1*<sup>-/-</sup> (E) fails to reduce IL-17A-induced pain (I.PL., 100 ng) in males. Two-way ANOVA with Bonferroni's post hoc; D:  $F_{(4, 28)} = 0.2786$ ; E:  $F_{(4, 32)} = 0.2119$ .

(F-G) Ca<sup>2+</sup> response induced by IL-17A (100 ng/ml, 2 min) in dissociated DRG neurons and its blockade by the TRPV1 antagonist AMG9810 (3  $\mu$ M) in females.

(F) Combined responses of all neurons.

(G) % quantification of responding neurons. n = 8 cultures from 3 mice per group. Unpaired two-tailed student t test:  $p < 0.0001$ ,  $t = 14.12$ .

Data are mean  $\pm$  SEM. AUC: Area under curve; RTX: Resiniferatoxin; I.PL.: Intraplantar; BL: Baseline.

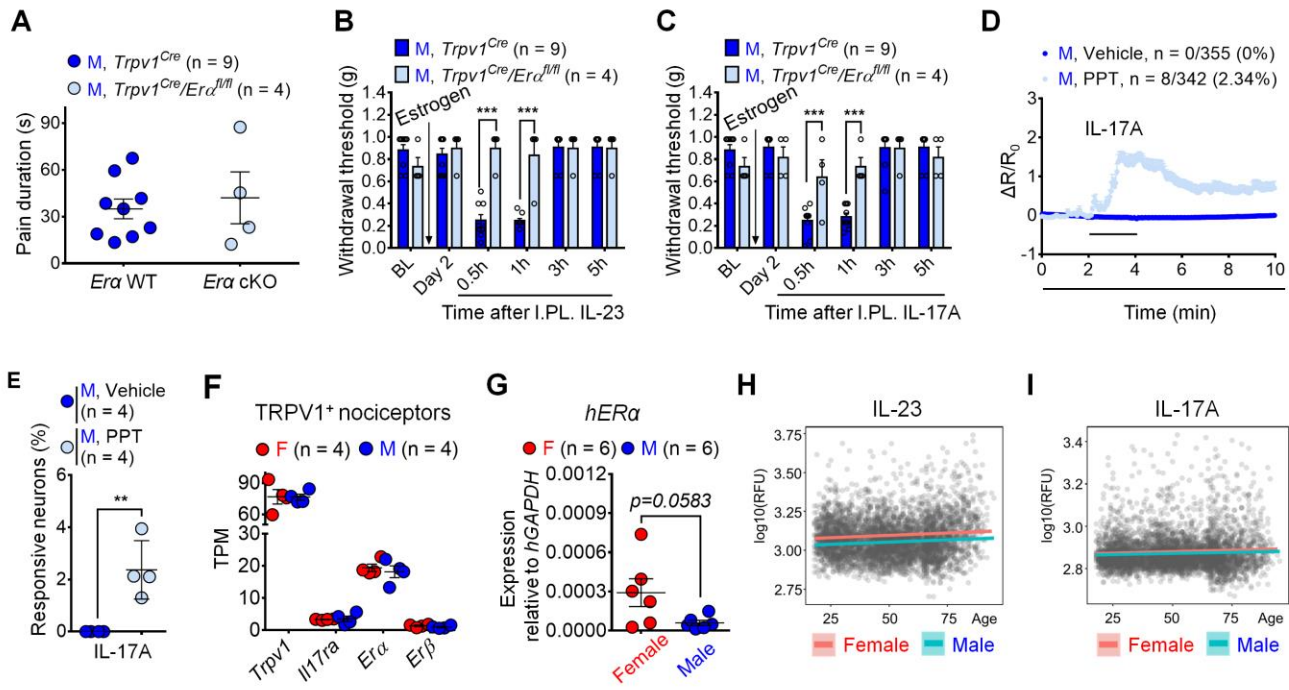

**Figure S8 (related to Figure 8). Characterization of *Era* cKO in male mice and Translational relevance of IL-23/IL-17A/*ERα* axis in humans.**

(A) Selective deletion of *Era* in nociceptors (*Era* cKO) fails to alter capsaicin-evoked spontaneous pain (I.PL., 500 ng) in males. Unpaired and two-tailed student t test;  $t = 0.4973$ .

(B-C) Estrogen treatment (S.C., 2 mg/kg) enables mechanical pain in male mice, induced by IL-23 (B, I.PL., 100 ng) or IL-17A (C, I.PL., 10 ng), which is abolished by *Era* cKO. \*\*\* $p < 0.001$ . Two-way ANOVA with Bonferroni's post hoc test; B:  $F_{(5, 55)} = 14.52$ ; C:  $F_{(5, 55)} = 8.752$ .

(D-E) IL-17A (10 ng/ml, 2 min) evokes  $Ca^{2+}$  influx in PPT (*ERα* agonist, 1 ng/ml, 24 h) incubated DRG neurons from male *Advillin<sup>Cre</sup>/GCamp6f* mice.

(D) Combined responses of all neurons.

(E) % quantification of responding neurons.  $n = 4$  cultures from 2 male mice. Unpaired two-tailed student t test;  $p = 0.0055$ ,  $t = 4.231$ .

(F) Transcriptional profiles of mouse *Nav1.8<sup>+</sup>* C-fiber nociceptors reveal no sex differences in neuronal expression of *Trpv1*, *Il17ra*, *Era* and *Erβ* (Tavares-Ferreira et al. 2020). Two-way ordinary ANOVA with Bonferroni's post hoc test;  $F_{(3, 24)} = 0.02263$ .

(G) qPCR showing the expression of human *ERα* and *ERβ* mRNAs in DRGs using alternative primer pairs. Human *GAPDH* was used as an internal control. Unpaired and two-tailed student t test;  $t = 2.137$ . Also see primer information in Table S2.

(H-I) Healthy women ( $n = 2,146$ ) display higher levels of IL-23 and IL-17A in plasma than healthy men ( $n = 2,117$ ) throughout the life span (Lehallier et al. 2019).

Data are mean  $\pm$  SEM. cKO: Conditional knockout mice; TPM: Transcripts per million; S.C.: Subcutaneous; I.PL.: Intraplantar; ER: Estrogen receptor

**Table S1 (related to Figures 4 and 5). Gating strategy and antibodies used for flow cytometry**

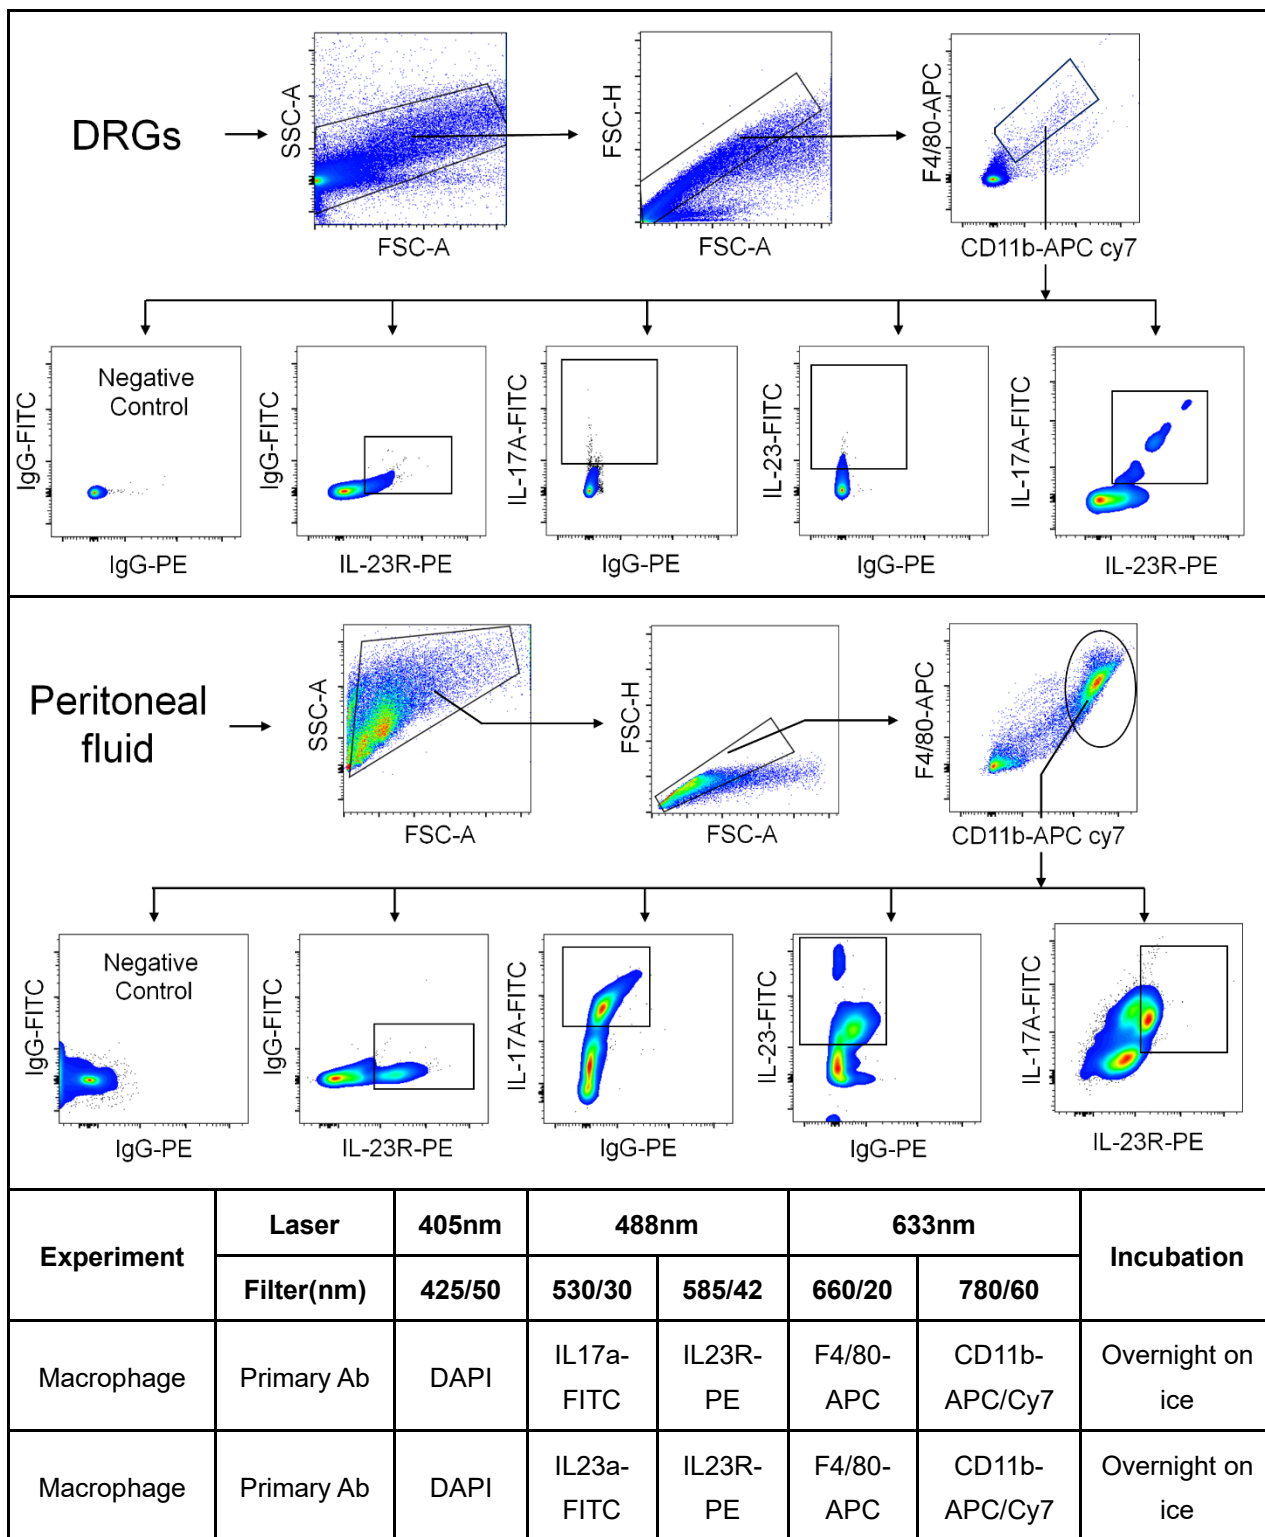

Total cells from DRG or peritoneal fluid were first gated on a forward scatter (FSC-A) / side scatter (SSC-A) plot and then on the FSC-A/FSC-H ( $2 \times 10^4$  cells). The total macrophage population was gated on F4/80 and CD11b, in which IL-23<sup>+</sup>, IL-23R<sup>+</sup>, IL-17A<sup>+</sup> and IL-17A<sup>+</sup>/IL-23R<sup>+</sup> subsets were detected and analyzed.

**Table S2 (related to Figure 8). qPCR primer sequences of human genes**

| TARGET GENE/SEQUENCE                                           | APPLICATION                  | GENEBANK#                      |
|----------------------------------------------------------------|------------------------------|--------------------------------|
| Primer: <i>hGAPDH</i> (Forward):<br>AGCCACATCGCTCAGACAC        | Figures 8I-8L,<br>Figure S8G | <a href="#">NM_002046.7</a>    |
| Primer: <i>hGAPDH</i> (Reverse):<br>GCCCAATACGACCAAATCC        |                              |                                |
| Primer: <i>hTPRV1</i> (Forward):<br>CTGCCCCGACCATCACAGTC       | Figure 8I                    | <a href="#">NM_080704.4</a>    |
| Primer: <i>hTPRV1</i> (Reverse):<br>CTGCGATCATAGAGCCTGAGG      |                              |                                |
| Primer: <i>hIL17RA</i> (1) (Forward):<br>GCTTCACCCTGTGGAACGAAT | Figure 8J                    | <a href="#">NM_014339.7</a>    |
| Primer: <i>hIL17RA</i> (1) (Reverse):<br>TATGTGGTGCATGTGCTCAAA |                              |                                |
| Primer: <i>hERα</i> (1) (Forward):<br>GCTTACTGACCAACCTGGCAGA   | Figure 8K                    | <a href="#">NM_000125.4</a>    |
| Primer: <i>hERα</i> (1) (Reverse):<br>GGATCTCTAGCCAGGCACATTC   |                              |                                |
| Primer: <i>hERβ</i> (1) (Forward):<br>AGCACGGCTCCATATACATACC   | Figure 8L                    | <a href="#">NM_001291712.2</a> |
| Primer: <i>hERβ</i> (1) (Reverse):<br>TGGACCACTAAAGGAGAAAGGT   |                              |                                |
| Primer: <i>hERα</i> (2) (Forward):<br>CCCACTCAACAGCGTGTCTC     | Figure S8G                   | <a href="#">NM_000125.4</a>    |
| Primer: <i>hERα</i> (2) (Reverse):<br>CGTCGATTATCTGAATTTGGCCT  |                              |                                |

**Table S3 (related to all figures). Number of animals used in all figures of this paper**

| Figure | Sample size                            | Number of groups             | Sample size | Sex                | Age (week) | Number of animals                               |
|--------|----------------------------------------|------------------------------|-------------|--------------------|------------|-------------------------------------------------|
| 1A     | n = 5-9 mice                           | 8                            | 50          | 20 male, 30 female | 8-10       | 50 WT mice                                      |
| 1B     | n = 5-9 mice                           | 8 (same mice with Figure 1A) | 50          | 20 male, 30 female | 8-10       | 50 WT mice                                      |
| 1C     | n = 5-9 mice                           | 8 (same mice with Figure 1A) | 50          | 20 male, 30 female | 8-10       | 50 WT mice                                      |
| 1D     | n = 15 mice                            | 2                            | 30          | 30 female          | 8-10       | 15 WT mice, 15 <i>I23<sup>r/-</sup></i> mice    |
| 1E     | n = 5 mice                             | 2                            | 10          | 10 male            | 8-10       | 10 WT mice                                      |
| 1H     | n = 6-10 mice                          | 4                            | 33          | 14 male, 19 female | 8-10       | 33 WT mice                                      |
| 1I     | n = 5-10 mice                          | 4                            | 30          | 10 male, 20 female | 8-10       | 30 WT mice                                      |
| 2A     | n = 7 mice                             | 4                            | 28          | 14 male, 14 female | 8-10       | 28 WT mice                                      |
| 2B     | n = 7 mice                             | 4 (same mice with Figure 2A) | 28          | 14 male, 14 female | 8-10       | 28 WT mice                                      |
| 2C     | n = 9-10 mice                          | 4                            | 39          | 19 male, 20 female | 8-10       | 20 WT mice, 19 <i>I23<sup>r/-</sup></i> mice    |
| 2D     | n = 5 mice                             | 4                            | 20          | 10 male, 10 female | 8-10       | 10 WT mice, 10 <i>I23<sup>r/-</sup></i> mice    |
| 2E     | n = 6 mice                             | 4                            | 24          | 12 male, 12 female | 8-10       | 24 WT mice                                      |
| 2F     | n = 5-6 mice                           | 4                            | 22          | 12 male, 10 female | 8-10       | 22 WT mice                                      |
| 2G     | n = 5 mice                             | 4                            | 20          | 10 male, 10 female | 8-10       | 20 WT mice                                      |
| 2H     | n = 5 mice                             | 4                            | 20          | 10 male, 10 female | 8-10       | 20 WT mice                                      |
| 2I     | n = 5-7 mice                           | 4                            | 22          | 10 male, 12 female | 8-10       | 22 WT mice                                      |
| 2J     | n = 5-7 mice                           | 4 (same mice with Figure 2I) | 22          | 10 male, 12 female | 8-10       | 22 WT mice                                      |
| 3A     | n = 5 mice                             | 2                            | 10          | 10 female          | 8-10       | 10 WT mice                                      |
| 3B     | n = 5 mice                             | 6                            | 30          | 30 male            | 8-10       | 30 WT mice                                      |
| 3C     | n = 5 mice                             | 2                            | 10          | 10 female          | 8-10       | 10 WT mice                                      |
| 3D     | n = 5 mice                             | 2                            | 10          | 10 male            | 8-10       | 10 WT mice                                      |
| 3E     | n = 5 mice                             | 2                            | 10          | 10 female          | 8-10       | 10 WT mice                                      |
| 3F     | n = 5 mice                             | 2                            | 10          | 10 male            | 8-10       | 10 WT mice                                      |
| 3G     | n = 5 mice                             | 4                            | 10          | 10 male, 10 female | 8-10       | 20 WT mice                                      |
| 4A     | n = 6 mice                             | 2                            | 12          | 12 female          | 8-10       | 12 WT mice                                      |
| 4B     | n = 6 cultures                         | 4                            | 24          | 12 male, 12 female | 8-10       | 24 WT mice                                      |
| 4C     | n = 5 mice                             | 4                            | 20          | 10 male, 10 female | 8-10       | 20 WT mice                                      |
| 4D     | n = 5 mice                             | 4                            | 20          | 10 male, 10 female | 8-10       | 20 WT mice                                      |
| 4E     | n = 5 mice                             | 4                            | 20          | 10 male, 10 female | 8-10       | 20 WT mice                                      |
| 4F     | n = 5-6 mice                           | 4                            | 21          | 21 female          | 8-10       | 11 Nude mice, 10 <i>Rag1<sup>-/-</sup></i> mice |
| 4G     | n = 5-9 mice                           | 4                            | 27          | 27 female          | 8-10       | 27 WT mice                                      |
| 4H     | n = 5 mice                             | 3                            | 15          | 15 female          | 8-10       | 15 WT mice                                      |
| 4I     | n = 5 mice                             | 2                            | 10          | 16 female          | 8-10       | 10 WT mice                                      |
| 4J,4K  | n = 212-237 neurons;<br>n = 6 cultures | 2                            | -           | 3 male, 3 female   | 5-8        | 6 <i>Advillin<sup>Cre</sup>/GCaMP6f</i> mice    |
| 4M     | n = 7 neurons                          | 2                            | -           | 3 female           | 5-8        | 3 WT mice                                       |
| 5A     | n = 5 mice                             | 8                            | 40          | 20 male, 20 female | 8-10       | 20 WT mice, 20 <i>I23<sup>r/-</sup></i> mice    |
| 5B     | n = 7 cultures                         | 4                            | 28          | 14 male, 14 female | 8-10       | 28 WT mice                                      |
| 5C     | n = 5 mice                             | 8                            | 40          | 20 male, 20 female | 8-10       | 40 WT mice                                      |
| 5D     | n = 5 mice                             | 8                            | 40          | 20 male, 20 female | 8-10       | 40 WT mice                                      |
| 5E     | n = 5 mice                             | 8 (same mice with Figure 5D) | 40          | 20 male, 20 female | 8-10       | 40 WT mice                                      |
| 5F     | n = 5 mice                             | 8 (same mice with Figure 5C) | 40          | 20 male, 20 female | 8-10       | 40 WT mice                                      |
| 5G     | n = 8 mice                             | 3                            | 24          | 24 female          | 8-10       | 24 WT mice                                      |
| 5H     | n = 6 mice                             | 2                            | 12          | 12 female          | 8-10       | 12 WT mice                                      |
| 5I     | n = 6 mice                             | 2                            | 12          | 12 female          | 8-10       | 6 WT mice, 6 <i>I23<sup>r/-</sup></i> mice      |
| 5J     | n = 5 mice                             | 2                            | 10          | 10 female          | 8-10       | 10 WT mice                                      |

|       |                                              |                                     |    |                    |      |                                                                                                |
|-------|----------------------------------------------|-------------------------------------|----|--------------------|------|------------------------------------------------------------------------------------------------|
| 5K    | n = 5 mice                                   | 2                                   | 10 | 10 male            | 8-10 | 10 WT mice                                                                                     |
| 5L    | n = 6 mice                                   | 4                                   | 24 | 12 male, 12 female | 8-10 | 24 WT mice                                                                                     |
| 5M    | n = 6 mice                                   | 4                                   | 24 | 12 male, 12 female | 8-10 | 24 WT mice                                                                                     |
| 6B,6C | n = 717-1209 neurons;<br>n = 8 – 12 cultures | 2                                   | -  | 4 male, 4 female   | 4-6  | 8 <i>Advillin<sup>Cre</sup>/GCaMP6f</i> mice                                                   |
| 6E    | n = 7 neurons                                | 2                                   | -  | 3 female           | 8-10 | 3 WT mice                                                                                      |
| 6G    | n = 9 neurons                                | 2                                   | -  | 3 male             | 8-10 | 3 WT mice                                                                                      |
| 6I    | n = 9 neurons                                | 2                                   | -  | 2 female           | -    | 2 NHP                                                                                          |
| 6K    | n = 8 neurons                                | 2                                   | -  | 1 male             | -    | 1 NHP                                                                                          |
| 7A    | n = 5-8 mice                                 | 4                                   | 27 | 27 female          | 8-10 | 27 <i>Trpv1<sup>-/-</sup></i> mice                                                             |
| 7B    | n = 5 mice                                   | 4 (same female mice with Figure 7A) | 20 | 10 male, 10 female | 8-10 | 20 <i>Trpv1<sup>-/-</sup></i> mice                                                             |
| 7C    | n = 5 mice                                   | 4                                   | 20 | 20 female          | 8-10 | 20 <i>Trpa1<sup>-/-</sup></i> mice                                                             |
| 7D    | n = 4-5 mice                                 | 4 (same female mice with Figure 7C) | 19 | 9 male, 10 female  | 8-10 | 19 <i>Trpa1<sup>-/-</sup></i> mice                                                             |
| 7E    | n = 5-10 mice                                | 8                                   | 50 | 30 male, 20 female | 8-10 | 50 WT mice                                                                                     |
| 7F    | n = 5 mice                                   | 2 (same mice with Figure 5H)        | 10 | 10 female          | 8-10 | 10 WT mice                                                                                     |
| 7G    | n = 5 mice                                   | 2 (same mice with Figure 5I)        | 10 | 10 male            | 8-10 | 10 WT mice                                                                                     |
| 7I    | n = 4 mice                                   | 2                                   | 8  | 4 male, 4 female   | 8-10 | 8 WT mice                                                                                      |
| 7J    | n = 4 mice                                   | 2 (same mice with Figure 7M)        | 8  | 4 male, 4 female   | 8-10 | 8 WT mice                                                                                      |
| 7K    | n = 4 mice                                   | 2 (same mice with Figure 7M)        | 8  | 4 male, 4 female   | 8-10 | 8 WT mice                                                                                      |
| 7L    | n = 5 mice                                   | 2                                   | 10 | 10 female          | 8-10 | 10 WT mice                                                                                     |
| 7M    | n = 6 mice                                   | 2                                   | 12 | 12 female          | 8-10 | 6 WT mice, 6 <i>Trpv1<sup>-/-</sup></i> mice                                                   |
| 7N,7O | n = 278 – 623 neurons;<br>n = 4 – 6 cultures | 2                                   | -  | 2 female           | 8-10 | 2 <i>Advillin<sup>Cre</sup>/GCaMP6f</i> mice                                                   |
| 7P    | n = 8 neurons                                | 2                                   | -  | 3 female           | 8-10 | 3 <i>Trpv1<sup>-/-</sup></i> mice                                                              |
| 8B    | n = 4 mice                                   | 2 (same mice with Figure 7M)        | 8  | 4 male, 4 female   | 8-10 | 8 WT mice                                                                                      |
| 8C    | n = 4 mice                                   | 2 (same mice with Figure 7M)        | 8  | 4 male, 4 female   | 8-10 | 8 WT mice                                                                                      |
| 8D    | n = 16 slides / 4 mice                       | 2 (same mice with Figure 7M)        | -  | 4 male, 4 female   | 8-10 | 8 WT mice                                                                                      |
| 8E    | n = 9-10 mice                                | 2                                   | 19 | 19 female          | 8-10 | 10 <i>Trpv1<sup>Cre</sup></i> mice,<br>9 <i>Trpv1<sup>Cre</sup>/Era<sup>fl/fl</sup></i> mice   |
| 8F    | n = 9-10 mice                                | 2 (same mice with Figure 8E)        | 19 | 19 female          | 8-10 | 10 <i>Trpv1<sup>Cre</sup></i> mice,<br>9 <i>Trpv1<sup>Cre</sup>/Era<sup>fl/fl</sup></i> mice e |
| 8G    | n = 9-10 mice                                | 2 (same mice with Figure 8E)        | 19 | 19 female          | 8-10 | 10 <i>Trpv1<sup>Cre</sup></i> mice,<br>9 <i>Trpv1<sup>Cre</sup>/Era<sup>fl/fl</sup></i> mice   |
| 8H    | n = 8-9 mice                                 | 2 (same mice with Figure 8E)        | 17 | 17 female          | 8-10 | 9 <i>Trpv1<sup>Cre</sup></i> mice,<br>8 <i>Trpv1<sup>Cre</sup>/Era<sup>fl/fl</sup></i> mice    |
| S1A   | n = 5-9 mice                                 | 8 (same mice with Figure 1A)        | 50 | 20 male, 30 female | 8-10 | 50 WT mice                                                                                     |
| S1B   | n = 5 mice                                   | 8                                   | 40 | 20 male, 20 female | 8-10 | 40 WT mice                                                                                     |
| S2A   | n = 4-5 mice                                 | 4 (same mice with Figure 2C)        | 19 | 9 male, 10 female  | 8-10 | 10 WT mice, 9 <i>Il23<sup>-/-</sup></i> mice                                                   |
| S2B   | n = 5 mice                                   | 4 (same mice with Figure 2D)        | 20 | 10 male, 10 female | 8-10 | 10 WT mice, 10 <i>Il23<sup>-/-</sup></i> mice                                                  |
| S3A   | n = 5 mice                                   | 2 (same mice with Figure 3G)        | 10 | 10 female          | 8-10 | 10 WT mice                                                                                     |
| S3B   | n = 5 mice                                   | 2 (same mice with Figure 3G)        | 10 | 10 male            | 8-10 | 10 WT mice                                                                                     |
| S3C   | n = 5 mice                                   | 4                                   | 20 | 10 male, 10 female | 8-10 | 20 WT mice                                                                                     |
| S3D   | n = 5 mice                                   | 4 (same mice with Figure S3C)       | 20 | 10 male, 10 female | 8-10 | 20 WT mice                                                                                     |
| S4B   | n = 8-9 mice                                 | 4                                   | 34 | 16 male, 18 female | 8-10 | 34 WT mice                                                                                     |
| S4D   | n = 14-17 mice                               | 4                                   | 61 | 29 male, 32 female | 8-10 | 61 WT mice                                                                                     |
| S4F   | n = 6 cultures                               | 4                                   | 24 | 12 male, 12 female | 8-10 | 24 WT mice                                                                                     |
| S4H   | n = 8-15 cultures                            | 4                                   | 45 | 20 male, 25 female | 8-10 | 45 WT mice                                                                                     |
| S5B   | n = 11-13 mice                               | 4                                   | 48 | 22 male, 26 female | 8-10 | 48 WT mice                                                                                     |
| S5D   | n = 11-13 mice                               | 4                                   | 46 | 22 male, 24 female | 8-10 | 46 WT mice                                                                                     |
| S5F   | n = 8 cultures                               | 4                                   | 32 | 16 male, 16 female | 8-10 | 32 WT mice                                                                                     |
| S5H   | n = 8-15 culture                             | 4                                   | 43 | 20 male, 23 female | 8-10 | 45 WT mice                                                                                     |
| S6B   | n = 1026-1046 neurons<br>n = 8 cultures      | 2 (same mice with Figure 6B)        | 3  | 4 male, 4 female   | 8-10 | 8 <i>Advillin<sup>Cre</sup>/GCaMP6f</i> mice                                                   |



|                        |                                       |                               |    |                    |      |                                                                                             |
|------------------------|---------------------------------------|-------------------------------|----|--------------------|------|---------------------------------------------------------------------------------------------|
| S7A                    | n = 5-11 mice                         | 8                             | 66 | 33 male, 33 female | 8-10 | 66 WT mice                                                                                  |
| S7B                    | n = 5-10 mice                         | 8 (same mice with Figure 7E)  | 50 | 30 male, 20 female | 8-10 | 50 WT mice                                                                                  |
| S7C                    | n = 5 mice                            | 2                             | 10 | 10 female          | 8-10 | 10 WT mice                                                                                  |
| S7D                    | n = 4-5 mice                          | 2                             | 9  | 9 male             | 8-10 | 9 WT mice                                                                                   |
| S7E                    | n = 4-6 mice                          | 2                             | 10 | 10 male            | 8-10 | 6 WT mice, 4 <i>Trpv<sup>-/-</sup></i> mice                                                 |
| S7F,7G                 | n = 679-765 neurons<br>n = 8 cultures | 2                             | -  | 3 female           | 8-10 | 3 <i>Advillin<sup>Cre</sup>/GCaMP6f</i> mice                                                |
| S8A                    | n = 4-9 mice                          | 2                             | 13 | 13 male            | 8-10 | 9 <i>Trpv1<sup>Cre</sup></i> mice,<br>4 <i>Trpv1<sup>Cre</sup>/Erg<sup>fl/fl</sup></i> mice |
| S8B                    | n = 4-9 mice                          | 2 (same mice with Figure S8A) | 13 | 13 male            | 8-10 | 9 <i>Trpv1<sup>Cre</sup></i> mice,<br>4 <i>Trpv1<sup>Cre</sup>/Erg<sup>fl/fl</sup></i> mice |
| S8C                    | n = 4-9 mice                          | 2 (same mice with Figure S8A) | 13 | 13 male            | 8-10 | 9 <i>Trpv1<sup>Cre</sup></i> mice,<br>4 <i>Trpv1<sup>Cre</sup>/Erg<sup>fl/fl</sup></i> mice |
| S8D,E                  | n = 342-355 neurons<br>n = 4 cultures | 2                             | 2  | 2 male             | 8-10 | 2 <i>Advillin<sup>Cre</sup>/GCaMP6f</i> mice                                                |
| <b>Total # of mice</b> |                                       |                               |    |                    |      | 1586 (678 male + 908 female)                                                                |
| <b>Total # of NHP</b>  |                                       |                               |    |                    |      | 3 (1 male + 2 female)                                                                       |
